# Supplementary material
Source: MDPI journal article supplement (https://www.mdpi.com/2297-8739/8/9/158)
Supplement: s1 [file s1]

## Supplementary materials

The most recent compound's identity on polyphenols from *Lippia turbinata*.

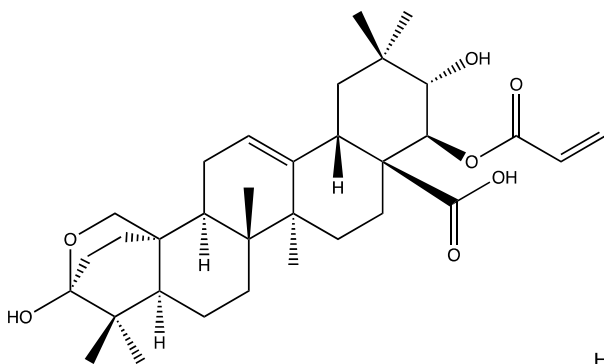

3b,25-epoxy-3a,21a-dihydroxy-22b-(3-methylbut-2-en-1-oyloxy)olean-12-ene-28-oic acid

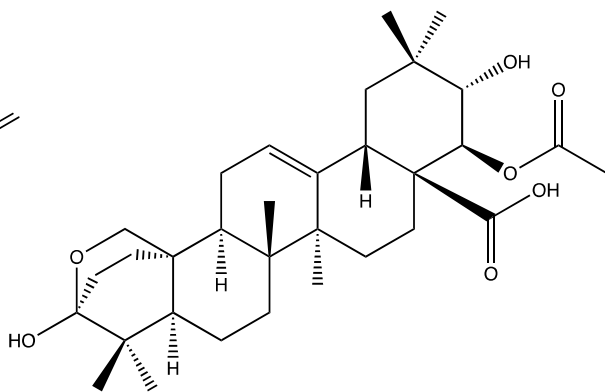

3b,25-epoxy-3a,21a-dihydroxy-22b-angeloyloxyolean-12-ene-28-oic acid

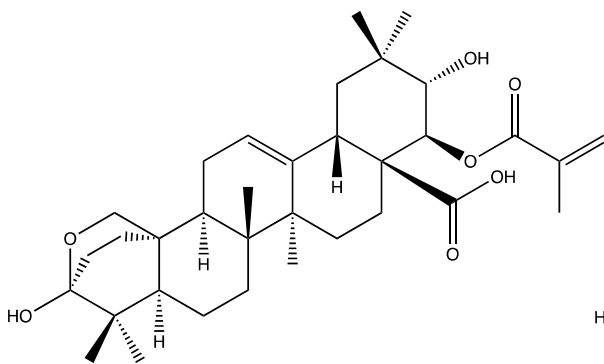

3b,25-epoxy-3a,21a-dihydroxy-22b-tigloyloxyolean-12-ene-28-oic acid

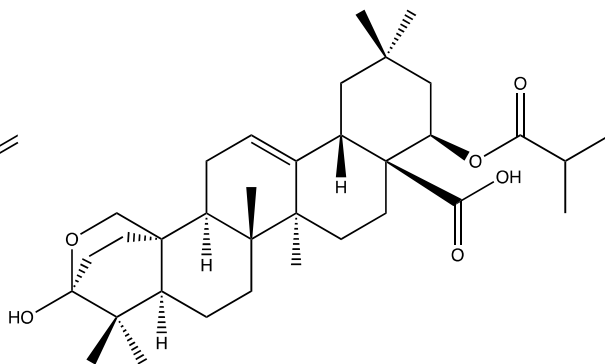

3a,25-epoxy-3a-hydroxy-22b-(2-methylbutan-1-oyloxy)olean-12-ene-28-oic acid
